# Supplementary material
Source: publisher figshare collection journal article supplement (https://acs.figshare.com/ndownloader/files/26822915)
Supplement: Supplementary file 1 [file 26822915]

# Pragmatic Improvement of Magnetic Exchange Couplings from Subsystem Density-Functional Theory through Orthogonalization of Subsystem Orbitals — Supporting Information —

Anja Massolle and Johannes Neugebauer<sup>1</sup>

Theoretische Organische Chemie, Organisch-Chemisches Institut  
and Center for Multiscale Theory and Computation,  
Westfälische Wilhelms-Universität Münster  
Corrensstraße 36, 48149 Münster, Germany

Date: February 16, 2021

---

<sup>1</sup>email: j.neugebauer@uni-muenster.de

## S1 Lewis Structures

In Fig. S1 the Lewis formulas of the radical monomers employed in this work are shown.

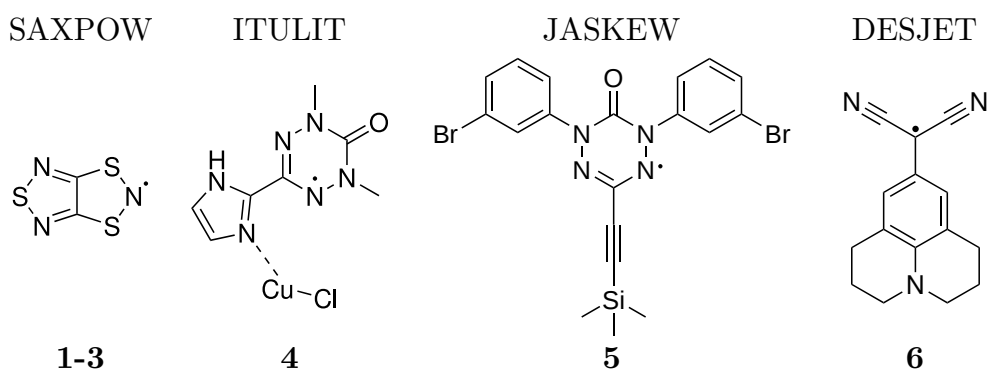

**Figure S1:** Lewis structures of the radical monomers studied in this work. The corresponding CCDC identifier is listed above the Lewis structure.

## S2 Density Error Introduced by the Orthogonalization

The integrated spin density error introduced by the Löwdin orthogonalization procedure is shown in Fig S2 to S6 for compounds **2-6**.

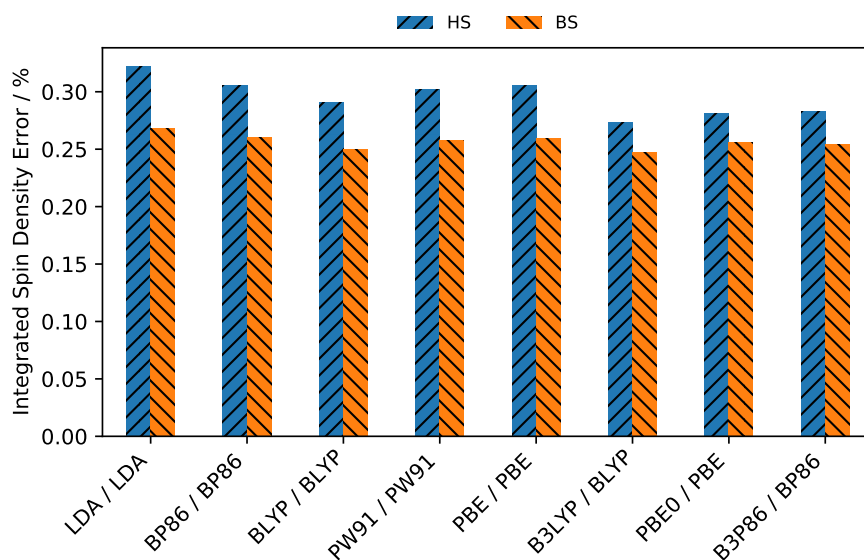

**Figure S2:** Integrated spin density error for compound **2** after applying the Löwdin orthogonalization. The XC / nad XC functional combination employed in the sDFT calculation is shown on the  $x$  axis.

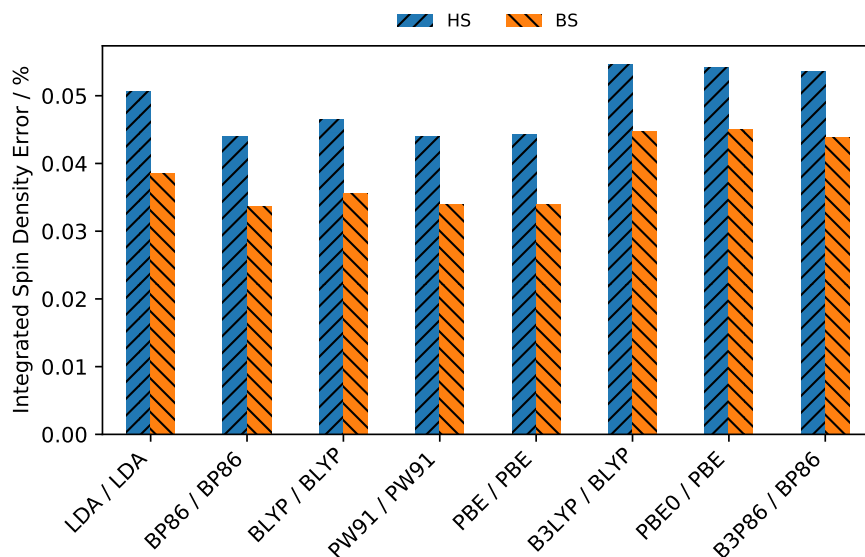

**Figure S3:** Integrated spin density error for compound **3** after applying the Löwdin orthogonalization. The XC / nad XC functional combination employed in the sDFT calculation is shown on the  $x$  axis.

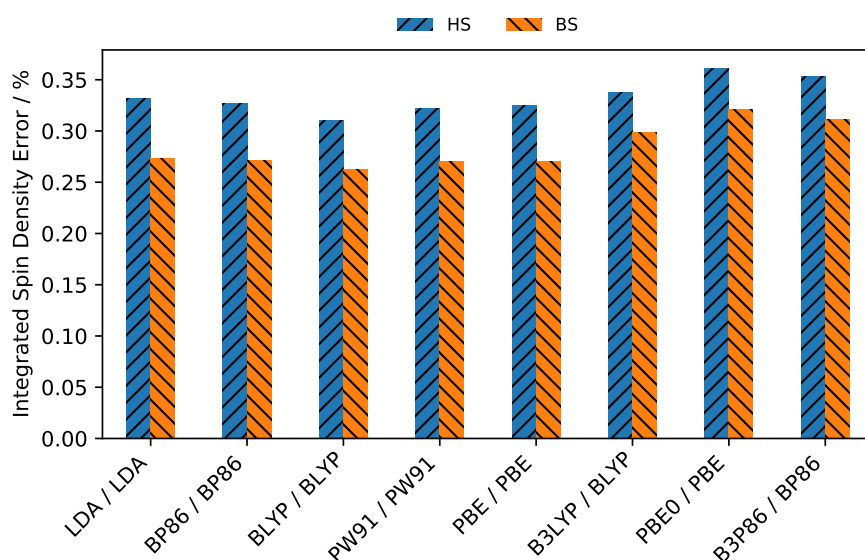

**Figure S4:** Integrated spin density error for compound **4** after applying the Löwdin orthogonalization. The XC / nad XC functional combination employed in the sDFT calculation is shown on the  $x$  axis.

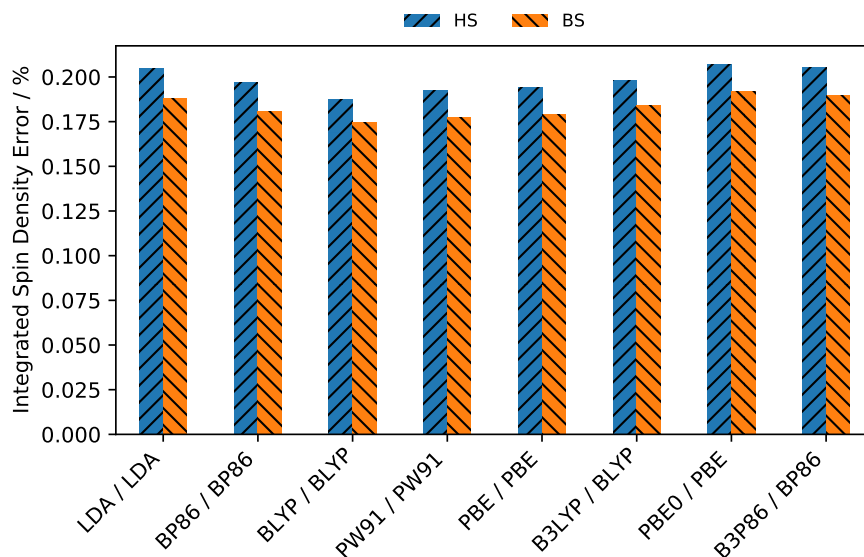

**Figure S5:** Integrated spin density error for compound **5** after applying the Löwdin orthogonalization. The XC / nad XC functional combination employed in the sDFT calculation is shown on the  $x$  axis.

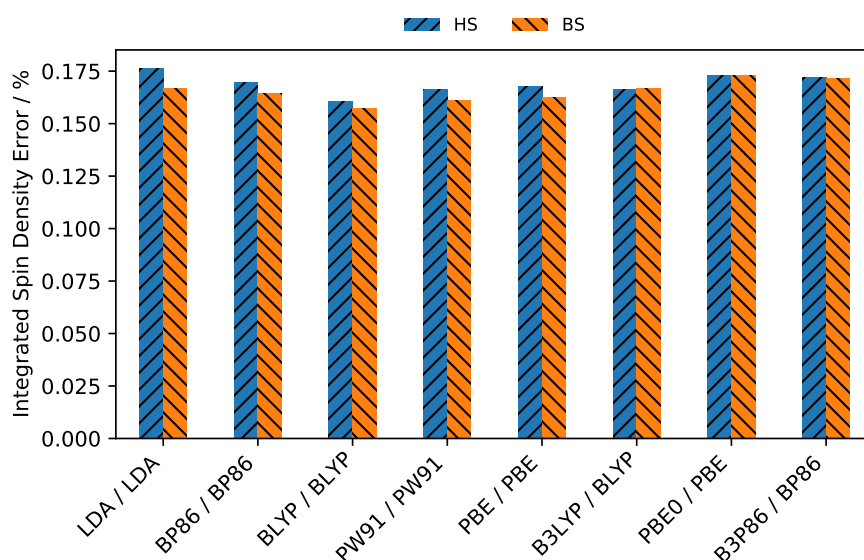

**Figure S6:** Integrated spin density error for compound **6** after applying the Löwdin orthogonalization. The XC / nad XC functional combination employed in the sDFT calculation is shown on the  $x$  axis.

## S3 Other Orthogonalization Techniques

To test the numeric stability of different orthogonalization techniques we calculated the magnetic coupling constant  $J$  with four different procedures.

**Löwdin** Löwdins symmetric orthogonalization<sup>1</sup> as described in the main article.

**Pipek** Pipeks iterative procedure which tries to keep the orbitals as local as possible.<sup>2</sup>

**Broer** Broers orthogonalization method which is based on corresponding orbitals.<sup>3</sup>

**T<sub>kin</sub><sup>non-ortho</sup>** The kinetic energy can also be calculated from non-orthogonal orbitals by expressing the density matrix in the following way:<sup>4</sup>

$$P = CS^{-1}C^{\text{T}}. \quad (\text{S1})$$

The kinetic energy of the supersystem can then be evaluated as:

$$E_{\text{kin}} = \sum_{i,j}^{n_{\text{bas}}} P_{ij} \left\langle \chi_i(\mathbf{r}) \left| -\frac{\nabla^2}{2} \right| \chi_j(\mathbf{r}) \right\rangle \quad (\text{S2})$$

Where  $\chi(\mathbf{r})$  are the AO basis functions and  $P$  is the density matrix from Eq. (S1).

In Tab. S1 the magnetic exchange coupling constants calculated with method B (only  $T_s^{\text{nad}}$  is calculated from the orthogonal orbitals) and the four orthogonalization procedures are listed.

**Table S1:** Mean values and standard deviations of  $J$  (in units of  $\text{cm}^{-1}$ ) calculated with the XC-functionals listed in the computational details for all investigated systems. When sDFT was employed  $T_s^{\text{nad}}$  was either calculated from a NAKE functional or by orthogonalized subsystem orbitals. Method B was employed for the energy evaluation via orthogonalized orbitals.

|                                           |      | <b>1</b> | <b>2</b> | <b>3</b> | <b>4</b> | <b>5</b> | <b>6</b> |
|-------------------------------------------|------|----------|----------|----------|----------|----------|----------|
| KS-DFT                                    | mean | -1696    | -195     | -19      | -833     | -499     | -6       |
|                                           | std  | 199      | 85       | 9        | 216      | 154      | 7        |
| sDFT, NAKE                                | mean | -61      | -10      | 0        | -27      | -11      | -3       |
|                                           | std  | 4        | 2        | 0        | 3        | 2        | 1        |
| sDFT, Löwdin                              | mean | -2724    | -162     | -10      | -845     | -406     | -12      |
|                                           | std  | 46       | 19       | 1        | 168      | 26       | 1        |
| sDFT, Pipek                               | mean | -2724    | -162     | -10      | -845     | -406     | -12      |
|                                           | std  | 46       | 19       | 1        | 168      | 26       | 1        |
| sDFT, Broer                               | mean | -2724    | -162     | -10      | -845     | -406     | -12      |
|                                           | std  | 46       | 19       | 1        | 168      | 26       | 1        |
| sDFT, $T_{\text{kin}}^{\text{non-ortho}}$ | mean | -2724    | -162     | -10      | -845     | -406     | -12      |
|                                           | std  | 46       | 19       | 1        | 168      | 26       | 1        |

## S4 Magnetic Exchange Coupling Constants

In Tab. S2 to S6 the magnetic exchange coupling constants calculated for compounds **2-6** with KS-DFT and different sDFT methods are compiled.

**Table S2:** Magnetic exchange coupling constants (in units of  $\text{cm}^{-1}$ ) evaluated with the PW91k NAKE functional, without any NAKE contribution and via method A and B for Löwdin orthogonalized orbitals for compound **2**.

| XC    | nad XC | NAKE | $T_s^{\text{nad}} = 0$ | Method A (all) | Method B ( $T_s^{\text{nad}}$ ) | KS-DFT |
|-------|--------|------|------------------------|----------------|---------------------------------|--------|
| LDA   | LDA    | -6   | 5                      | -18            | -188                            | -328   |
| BP86  | BP86   | -12  | -1                     | -21            | -174                            | -237   |
| BLYP  | BLYP   | -13  | -3                     | -22            | -168                            | -225   |
| PW91  | PW91   | -10  | 0                      | -20            | -172                            | -230   |
| PBE   | PBE    | -10  | 0                      | -21            | -175                            | -236   |
| B3LYP | BLYP   | -11  | 0                      | -19            | -140                            | -104   |
| PBE0  | PBE    | -9   | 2                      | -17            | -138                            | -93    |
| B3P86 | BP86   | -10  | 2                      | -18            | -143                            | -105   |

**Table S3:** Magnetic exchange coupling constants (in units of  $\text{cm}^{-1}$ ) evaluated with the PW91k NAKE functional, without any NAKE contribution and via method A and B for Löwdin orthogonalized orbitals for compound **3**.

| XC    | nad XC | NAKE | $T_s^{\text{nad}} = 0$ | Method A (all) | Method B ( $T_s^{\text{nad}}$ ) | KS-DFT |
|-------|--------|------|------------------------|----------------|---------------------------------|--------|
| LDA   | LDA    | 0    | 0                      | -2             | -12                             | -33    |
| BP86  | BP86   | 0    | 0                      | -2             | -11                             | -23    |
| BLYP  | BLYP   | 0    | 0                      | -2             | -11                             | -23    |
| PW91  | PW91   | 0    | 0                      | -2             | -11                             | -22    |
| PBE   | PBE    | 0    | 0                      | -2             | -11                             | -23    |
| B3LYP | BLYP   | 0    | 0                      | -1             | -9                              | -9     |
| PBE0  | PBE    | 0    | 0                      | -1             | -8                              | -7     |
| B3P86 | BP86   | 0    | 0                      | -1             | -9                              | -9     |



**Table S4:** Magnetic exchange coupling constants (in units of  $\text{cm}^{-1}$ ) evaluated with the PW91k NAKE functional, without any NAKE contribution and via method A and B for Löwdin orthogonalized orbitals for compound **4**.

| XC    | nad XC | NAKE | $T_s^{\text{nad}} = 0$ | Method A (all) | Method B ( $T_s^{\text{nad}}$ ) | KS-DFT |
|-------|--------|------|------------------------|----------------|---------------------------------|--------|
| LDA   | LDA    | -22  | 10                     | -131           | -692                            | -940   |
| BP86  | BP86   | -26  | 7                      | -138           | -746                            | -1106  |
| BLYP  | BLYP   | -30  | 1                      | -139           | -729                            | -1088  |
| PW91  | PW91   | -25  | 8                      | -134           | -732                            | -530   |
| PBE   | PBE    | -26  | 7                      | -135           | -723                            | -548   |
| B3LYP | BLYP   | -31  | 17                     | -171           | -1019                           | -843   |
| PBE0  | PBE    | -27  | 28                     | -174           | -1072                           | -773   |
| B3P86 | BP86   | -27  | 24                     | -170           | -1047                           | -839   |

**Table S5:** Magnetic exchange coupling constants (in units of  $\text{cm}^{-1}$ ) evaluated with the PW91k NAKE functional, without any NAKE contribution and via method A and B for Löwdin orthogonalized orbitals for compound **5**.

| XC    | nad XC | NAKE | $T_s^{\text{nad}} = 0$ | Method A (all) | Method B ( $T_s^{\text{nad}}$ ) | KS-DFT |
|-------|--------|------|------------------------|----------------|---------------------------------|--------|
| LDA   | LDA    | -7   | 5                      | -56            | -387                            | -731   |
| BP86  | BP86   | -11  | 1                      | -59            | -394                            | -584   |
| BLYP  | BLYP   | -14  | -2                     | -60            | -382                            | -569   |
| PW91  | PW91   | -11  | 2                      | -58            | -388                            | -562   |
| PBE   | PBE    | -11  | 2                      | -57            | -390                            | -571   |
| B3LYP | BLYP   | -13  | 5                      | -67            | -426                            | -337   |
| PBE0  | PBE    | -10  | 10                     | -68            | -444                            | -305   |
| B3P86 | BP86   | -11  | 8                      | -66            | -438                            | -336   |

**Table S6:** Magnetic exchange coupling constants (in units of  $\text{cm}^{-1}$ ) evaluated with the PW91k NAKE functional, without any NAKE contribution and via method A and B for Löwdin orthogonalized orbitals for compound **6**.

| XC    | nad XC | NAKE | $T_s^{\text{nad}} = 0$ | Method A (all) | Method B ( $T_s^{\text{nad}}$ ) | KS-DFT |
|-------|--------|------|------------------------|----------------|---------------------------------|--------|
| LDA   | LDA    | -1   | 2                      | 0              | -8                              | -14    |
| BP86  | BP86   | -3   | -1                     | -3             | -12                             | -10    |
| BLYP  | BLYP   | -4   | -2                     | -3             | -12                             | -12    |
| PW91  | PW91   | -3   | -1                     | -2             | -11                             | -10    |
| PBE   | PBE    | -3   | -1                     | -2             | -12                             | -9     |
| B3LYP | BLYP   | -3   | -1                     | -2             | -12                             | 1      |
| PBE0  | PBE    | -2   | -1                     | -1             | -12                             | 3      |
| B3P86 | BP86   | -3   | -1                     | -2             | -12                             | 2      |

The magnetic exchange coupling constants of **1** to **6** calculated with sDFT using the PW91k NAKE functional, orthogonalized orbitals and KS-DFT are depicted in Fig. S7 to S12.

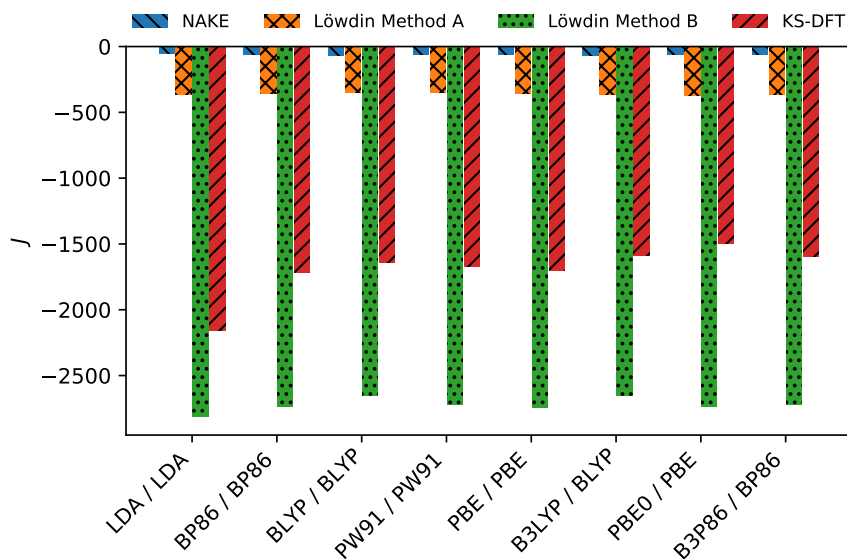

**Figure S7:** Magnetic exchange coupling constants evaluated for compound **1** with different schemes for the calculation of  $T_s^{\text{nad}}$  and various XC / nad XC functionals. NAKE:  $T_s^{\text{nad}}$  evaluated with a NAKE functional and Löwdin:  $T_s^{\text{nad}}$  evaluated from Löwdin orthogonalized orbitals via method A or B. The corresponding KS-DFT values calculated with the listed XC functional are shown for reference.

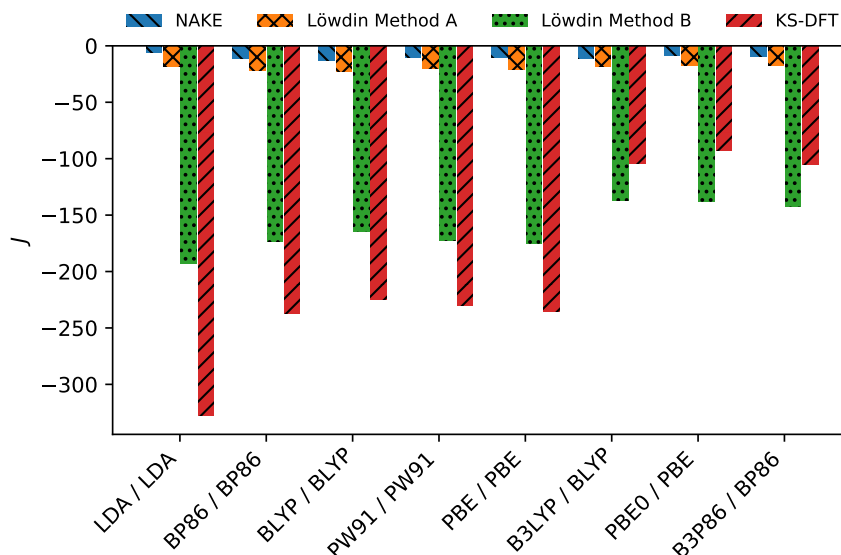

**Figure S8:** Magnetic exchange coupling constants evaluated for compound **2** with different schemes for the calculation of  $T_s^{\text{nad}}$  and various XC / nad XC functionals. NAKE:  $T_s^{\text{nad}}$  evaluated with a NAKE functional and Löwdin:  $T_s^{\text{nad}}$  evaluated from Löwdin orthogonalized orbitals via method A or B. The corresponding KS-DFT values calculated with the listed XC functional are shown for reference.

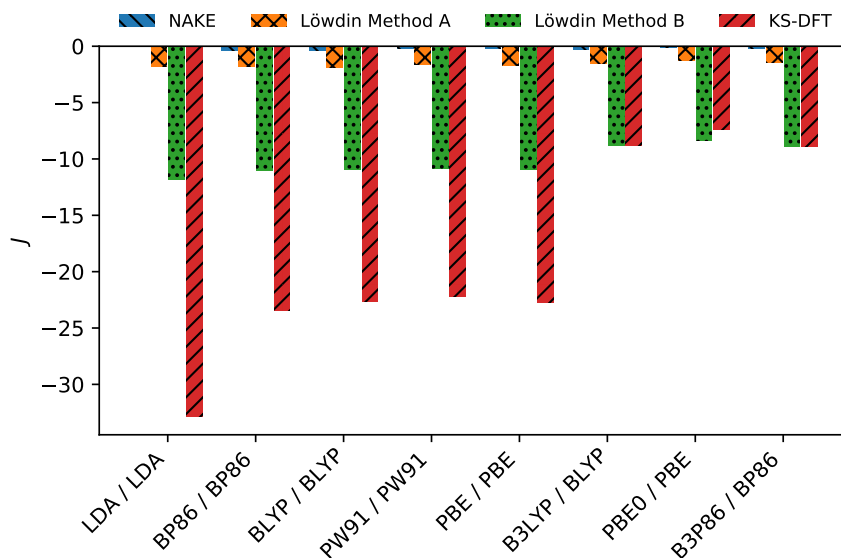

**Figure S9:** Magnetic exchange coupling constants evaluated for compound **3** with different schemes for the calculation of  $T_s^{\text{nad}}$  and various XC / nad XC functionals. NAKE:  $T_s^{\text{nad}}$  evaluated with a NAKE functional and Löwdin:  $T_s^{\text{nad}}$  evaluated from Löwdin orthogonalized orbitals via method A or B. The corresponding KS-DFT values calculated with the listed XC functional are shown for reference.

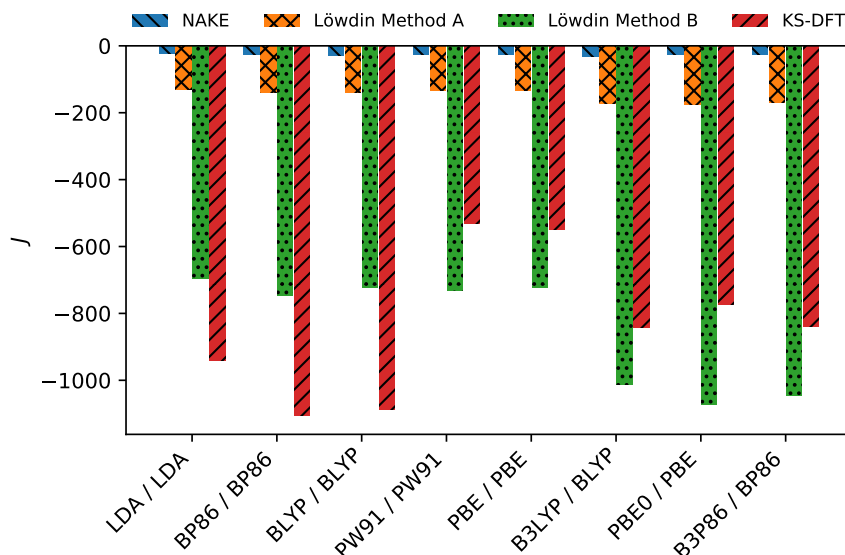

**Figure S10:** Magnetic exchange coupling constants evaluated for compound **4** with different schemes for the calculation of  $T_s^{\text{nad}}$  and various XC / nad XC functionals. NAKE:  $T_s^{\text{nad}}$  evaluated with a NAKE functional and Löwdin:  $T_s^{\text{nad}}$  evaluated from Löwdin orthogonalized orbitals via method A or B. The corresponding KS-DFT values calculated with the listed XC functional are shown for reference.

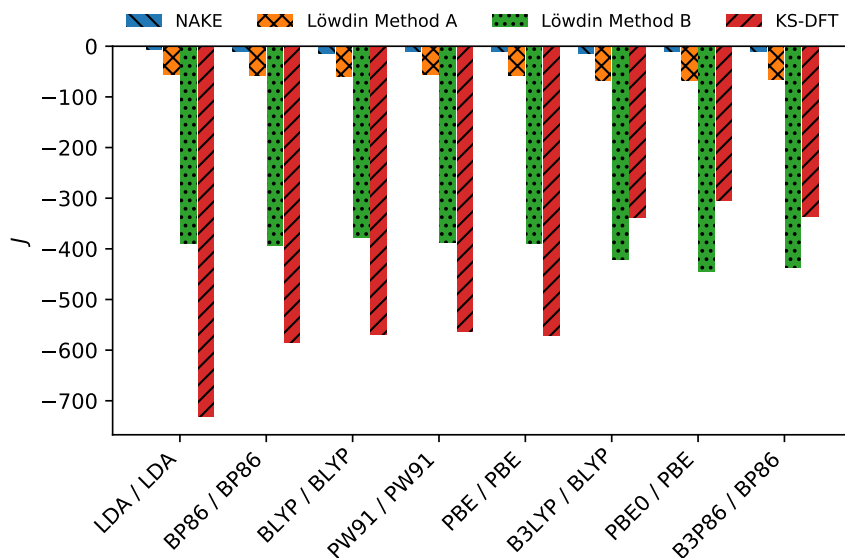

**Figure S11:** Magnetic exchange coupling constants evaluated for compound **5** with different schemes for the calculation of  $T_s^{\text{nad}}$  and various XC / nad XC functionals. NAKE:  $T_s^{\text{nad}}$  evaluated with a NAKE functional and Löwdin:  $T_s^{\text{nad}}$  evaluated from Löwdin orthogonalized orbitals via method A or B. The corresponding KS-DFT values calculated with the listed XC functional are shown for reference.

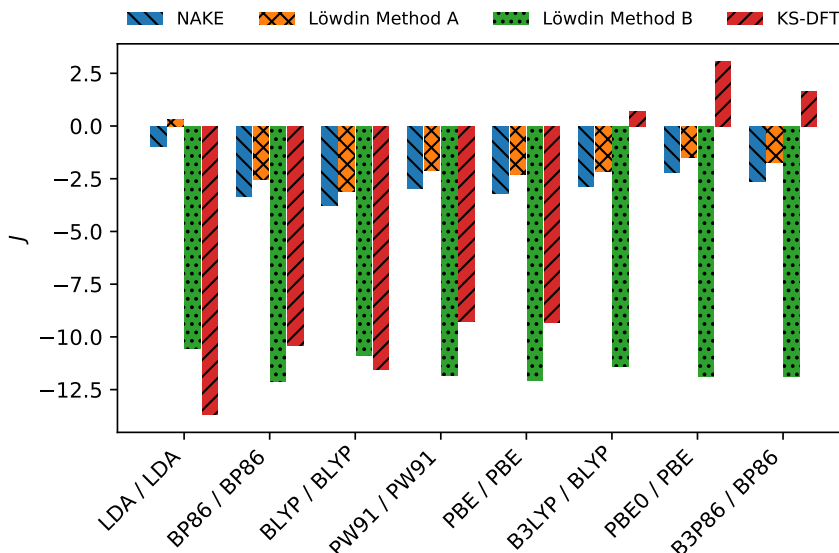

**Figure S12:** Magnetic exchange coupling constants evaluated for compound **6** with different schemes for the calculation of  $T_s^{\text{nad}}$  and various XC / nad XC functionals. NAKE:  $T_s^{\text{nad}}$  evaluated with a NAKE functional and Löwdin:  $T_s^{\text{nad}}$  evaluated from Löwdin orthogonalized orbitals via method A or B. The corresponding KS-DFT values calculated with the listed XC functional are shown for reference.

## S5 Basis-Set Dependency

To further investigate the basis-set dependency of the sDFT calculations the difference in the spin density introduced by a change of the basis-set is investigated. Figure S13 shows the difference in the spin density introduced by a change of the basis-set from def2-TZVP to def2-SVP. In case of the sDFT and KS-DFT calculations a change in the spin density is visible. The influence of the basis-set on the spin density is large compared to the spin density difference introduced by the orthogonalization procedure, see Fig. 3 in the main article (the isovalue used in Fig. 3 is a power of ten smaller).

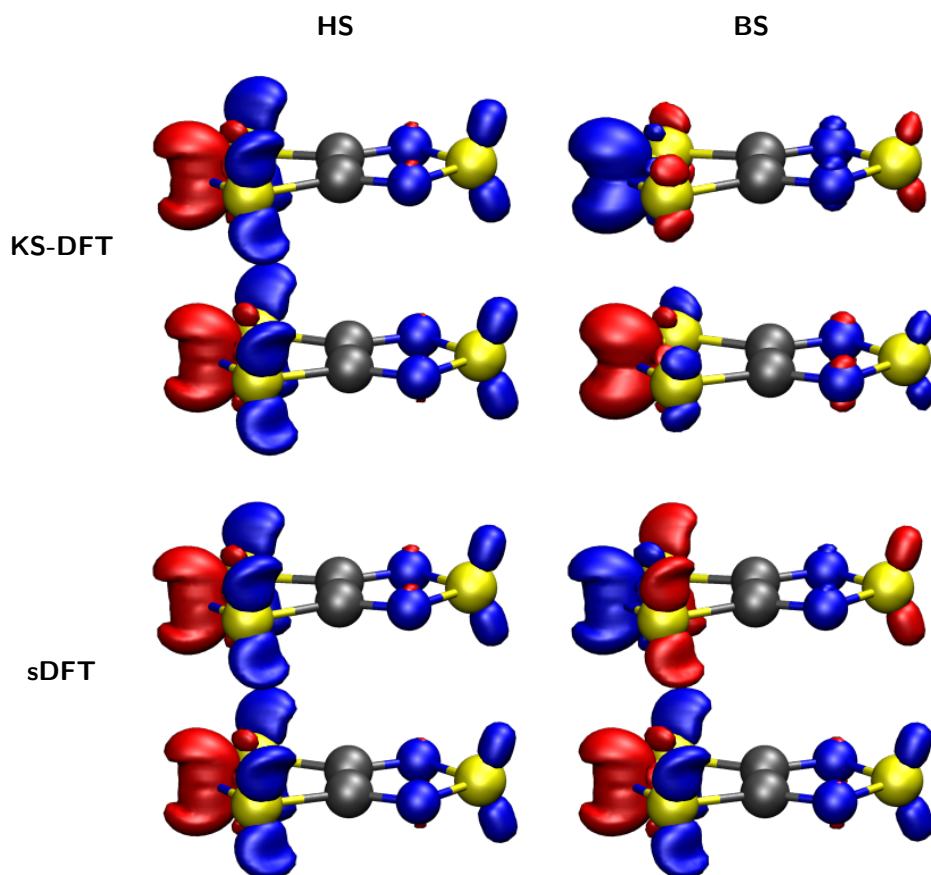

**Figure S13:** Spin density difference between the def2-TZVP and def2-SVP basis-set of the HS (left) and BS (right) state of dimer **1**. The PBE0/PBE/PW91k functional combination was used for the sDFT calculations (bottom) while the PBE0 XC-functional was employed in the KS-DFT calculations (top). An isovalue of  $0.001 E_h$  was applied.

The magnetic exchange coupling constants shown in Tab. 6 in the main article indicate an increase of the absolute value by about 50% when the def2-TZVP basis-set is used instead of the def2-SVP one. In Tab. S8 to S12 the BS–HS energy differences of the electrostatic, kinetic, XC and total energy contributions are listed for the def2-SVP and def2-TZVP basis-set.

**Table S7:** Electrostatic, kinetic, XC and total energy differences between the BS and HS state of dimer **1** for the def2-SVP and def2-TZVP basis-set and the PBE0/PBE/PW91k functional combination. All energy differences are given in  $E_h$ .

|                                                  | KS-DFT     |            | Subsystem DFT |            |            |            |
|--------------------------------------------------|------------|------------|---------------|------------|------------|------------|
|                                                  | PBE0       | NAKE       | Pot. Rec.     |            | Löwdin     |            |
|                                                  |            |            | Method A      | Method B   | Method A   | Method B   |
| def2-SVP                                         |            |            |               |            |            |            |
| $\Delta E_{\text{electrostatic}}^{\text{BS-HS}}$ | 0.081 603  | 0.002 947  | 0.007 750     | 0.002 947  | 0.012 552  | 0.002 947  |
| $\Delta E_{\text{kin}}^{\text{BS-HS}}$           | -0.110 161 | -0.003 692 | -0.013 894    | -0.013 894 | -0.016 074 | -0.016 074 |
| $\Delta E_{\text{XC}}^{\text{BS-HS}}$            | 0.020 722  | 0.000 463  | 0.000 726     | 0.000 463  | 0.001 804  | 0.000 465  |
| $\Delta E_{\text{total}}^{\text{BS-HS}}$         | -0.007 836 | -0.000 282 | -0.005 418    | -0.010 484 | -0.001 719 | -0.012 662 |
| def2-TZVP                                        |            |            |               |            |            |            |
| $\Delta E_{\text{electrostatic}}^{\text{BS-HS}}$ | 0.090 488  | 0.004 135  | -0.000 301    | 0.004 135  | 0.019 507  | 0.004 135  |
| $\Delta E_{\text{kin}}^{\text{BS-HS}}$           | -0.125 424 | -0.005 599 | -0.007 072    | -0.007 072 | -0.025 186 | -0.025 186 |
| $\Delta E_{\text{XC}}^{\text{BS-HS}}$            | 0.025 627  | 0.001 038  | 0.000 790     | 0.001 038  | 0.003 247  | 0.001 039  |
| $\Delta E_{\text{total}}^{\text{BS-HS}}$         | -0.009 309 | -0.000 427 | -0.006 584    | -0.001 899 | -0.002 432 | -0.020 011 |

**Table S8:** Electrostatic, kinetic, XC and total energy differences between the BS and HS state of dimer **2** for the def2-SVP and def2-TZVP basis-set and the PBE0/PBE/PW91k functional combination. All energy differences are given in  $E_h$ .

| Subsystem DFT                                    |            |            |            |
|--------------------------------------------------|------------|------------|------------|
|                                                  | NAKE       | Method A   | Method B   |
| def2-SVP                                         |            |            |            |
| $\Delta E_{\text{electrostatic}}^{\text{BS-HS}}$ | 0.000 529  | 0.001 023  | 0.000 529  |
| $\Delta E_{\text{BS-HS}}^{\text{kin}}$           | -0.000 657 | -0.001 247 | -0.001 247 |
| $\Delta E_{\text{XC}}^{\text{BS-HS}}$            | 0.000 089  | 0.000 146  | 0.000 089  |
| $\Delta E_{\text{total}}^{\text{BS-HS}}$         | -0.000 040 | -0.000 078 | -0.000 629 |
| def2-TZVP                                        |            |            |            |
| $\Delta E_{\text{electrostatic}}^{\text{BS-HS}}$ | 0.001 003  | 0.002 453  | 0.001 003  |
| $\Delta E_{\text{BS-HS}}^{\text{kin}}$           | -0.001 371 | -0.003 093 | -0.003 093 |
| $\Delta E_{\text{XC}}^{\text{BS-HS}}$            | 0.000 294  | 0.000 472  | 0.000 293  |
| $\Delta E_{\text{total}}^{\text{BS-HS}}$         | -0.000 074 | -0.000 169 | -0.001 797 |

**Table S9:** Electrostatic, kinetic, XC and total energy differences between the BS and HS state of dimer **3** for the def2-SVP and def2-TZVP basis-set and the PBE0/PBE/PW91k functional combination. All energy differences are given in  $E_h$ .

|                                                  | Subsystem DFT |            |            |
|--------------------------------------------------|---------------|------------|------------|
|                                                  | NAKE          |            |            |
|                                                  |               | Method A   | Method B   |
| def2-SVP                                         |               |            |            |
| $\Delta E_{\text{electrostatic}}^{\text{BS-HS}}$ | 0.000 009     | 0.000 035  | 0.000 009  |
| $\Delta E_{\text{kin}}^{\text{BS-HS}}$           | -0.000 012    | -0.000 049 | -0.000 049 |
| $\Delta E_{\text{XC}}^{\text{BS-HS}}$            | 0.000 003     | 0.000 008  | 0.000 003  |
| $\Delta E_{\text{total}}^{\text{BS-HS}}$         | -0.000 001    | -0.000 006 | -0.000 038 |
| def2-TZVP                                        |               |            |            |
| $\Delta E_{\text{electrostatic}}^{\text{BS-HS}}$ | -0.000 020    | -0.000 015 | -0.000 020 |
| $\Delta E_{\text{kin}}^{\text{BS-HS}}$           | 0.000 022     | 0.000 011  | 0.000 011  |
| $\Delta E_{\text{XC}}^{\text{BS-HS}}$            | 0.000 001     | 0.000 003  | 0.000 001  |
| $\Delta E_{\text{total}}^{\text{BS-HS}}$         | 0.000 002     | -0.000 001 | -0.000 009 |

**Table S10:** Electrostatic, kinetic, XC and total energy differences between the BS and HS state of dimer **4** for the def2-SVP and def2-TZVP basis-set and the PBE0/PBE/PW91k functional combination. All energy differences are given in  $E_h$ .

|                                                  | Subsystem DFT |            |            |
|--------------------------------------------------|---------------|------------|------------|
|                                                  | NAKE          |            |            |
|                                                  |               | Method A   | Method B   |
| def2-SVP                                         |               |            |            |
| $\Delta E_{\text{electrostatic}}^{\text{BS-HS}}$ | 0.000 883     | 0.004 310  | 0.000 883  |
| $\Delta E_{\text{kin}}^{\text{BS-HS}}$           | -0.001 243    | -0.006 043 | -0.006 043 |
| $\Delta E_{\text{XC}}^{\text{BS-HS}}$            | 0.000 238     | 0.000 933  | 0.000 241  |
| $\Delta E_{\text{total}}^{\text{BS-HS}}$         | -0.000 123    | -0.000 799 | -0.004 919 |
| def2-TZVP                                        |               |            |            |
| $\Delta E_{\text{electrostatic}}^{\text{BS-HS}}$ | 0.000 826     | 0.005 967  | 0.000 826  |
| $\Delta E_{\text{kin}}^{\text{BS-HS}}$           | -0.001 410    | -0.008 459 | -0.008 459 |
| $\Delta E_{\text{XC}}^{\text{BS-HS}}$            | 0.000 440     | 0.001 431  | 0.000 442  |
| $\Delta E_{\text{total}}^{\text{BS-HS}}$         | -0.000 144    | -0.001 060 | -0.007 190 |



**Table S11:** Electrostatic, kinetic, XC and total energy differences between the BS and HS state of dimer **5** for the def2-SVP and def2-TZVP basis-set and the PBE0/PBE/PW91k functional combination. All energy differences are given in  $E_h$ .

|                                                  | Subsystem DFT |            |            |
|--------------------------------------------------|---------------|------------|------------|
|                                                  | NAKE          |            |            |
|                                                  |               | Method A   | Method B   |
| def2-SVP                                         |               |            |            |
| $\Delta E_{\text{electrostatic}}^{\text{BS-HS}}$ | 0.000 362     | 0.001 768  | 0.000 362  |
| $\Delta E_{\text{kin}}^{\text{BS-HS}}$           | -0.000 511    | -0.002 496 | -0.002 496 |
| $\Delta E_{\text{XC}}^{\text{BS-HS}}$            | 0.000 102     | 0.000 419  | 0.000 102  |
| $\Delta E_{\text{total}}^{\text{BS-HS}}$         | -0.000 046    | -0.000 309 | -0.002 031 |
| def2-TZVP                                        |               |            |            |
| $\Delta E_{\text{electrostatic}}^{\text{BS-HS}}$ | 0.000 358     | 0.002 706  | 0.000 358  |
| $\Delta E_{\text{kin}}^{\text{BS-HS}}$           | -0.000 617    | -0.003 818 | -0.003 818 |
| $\Delta E_{\text{XC}}^{\text{BS-HS}}$            | 0.000 203     | 0.000 689  | 0.000 196  |
| $\Delta E_{\text{total}}^{\text{BS-HS}}$         | -0.000 057    | -0.000 422 | -0.003 263 |

**Table S12:** Electrostatic, kinetic, XC and total energy differences between the BS and HS state of dimer **6** for the def2-SVP and def2-TZVP basis-set and the PBE0/PBE/PW91k functional combination. All energy differences are given in  $E_h$ .

|                                                  | Subsystem DFT |            |            |
|--------------------------------------------------|---------------|------------|------------|
|                                                  | NAKE          |            |            |
|                                                  |               | Method A   | Method B   |
| def2-SVP                                         |               |            |            |
| $\Delta E_{\text{electrostatic}}^{\text{BS-HS}}$ | 0.000 081     | 0.000 117  | 0.000 081  |
| $\Delta E_{\text{kin}}^{\text{BS-HS}}$           | -0.000 114    | -0.000 158 | -0.000 158 |
| $\Delta E_{\text{XC}}^{\text{BS-HS}}$            | 0.000 023     | 0.000 034  | 0.000 023  |
| $\Delta E_{\text{total}}^{\text{BS-HS}}$         | -0.000 010    | -0.000 007 | -0.000 054 |
| def2-TZVP                                        |               |            |            |
| $\Delta E_{\text{electrostatic}}^{\text{BS-HS}}$ | 0.000 016     | -0.000 019 | 0.000 016  |
| $\Delta E_{\text{kin}}^{\text{BS-HS}}$           | -0.000 034    | 0.000 013  | 0.000 013  |
| $\Delta E_{\text{XC}}^{\text{BS-HS}}$            | 0.000 020     | 0.000 011  | 0.000 018  |
| $\Delta E_{\text{total}}^{\text{BS-HS}}$         | 0.000 002     | 0.000 005  | 0.000 047  |

## S6 Geometric Dependency – Orbitals

The heat maps in Fig. 6 in the main article show a sign change of the coupling constant at  $\Delta h = 1.8, 2.4 \text{ \AA}$  and  $3.0 \text{ \AA}$ . The SOMO orbitals of the HS and BS state with  $\Delta v = 0.0 \text{ \AA}$  and  $\Delta h = 0.0, 1.2, 1.8, 2.4 \text{ \AA}$  and  $3.0 \text{ \AA}$  are shown in Fig. S14.

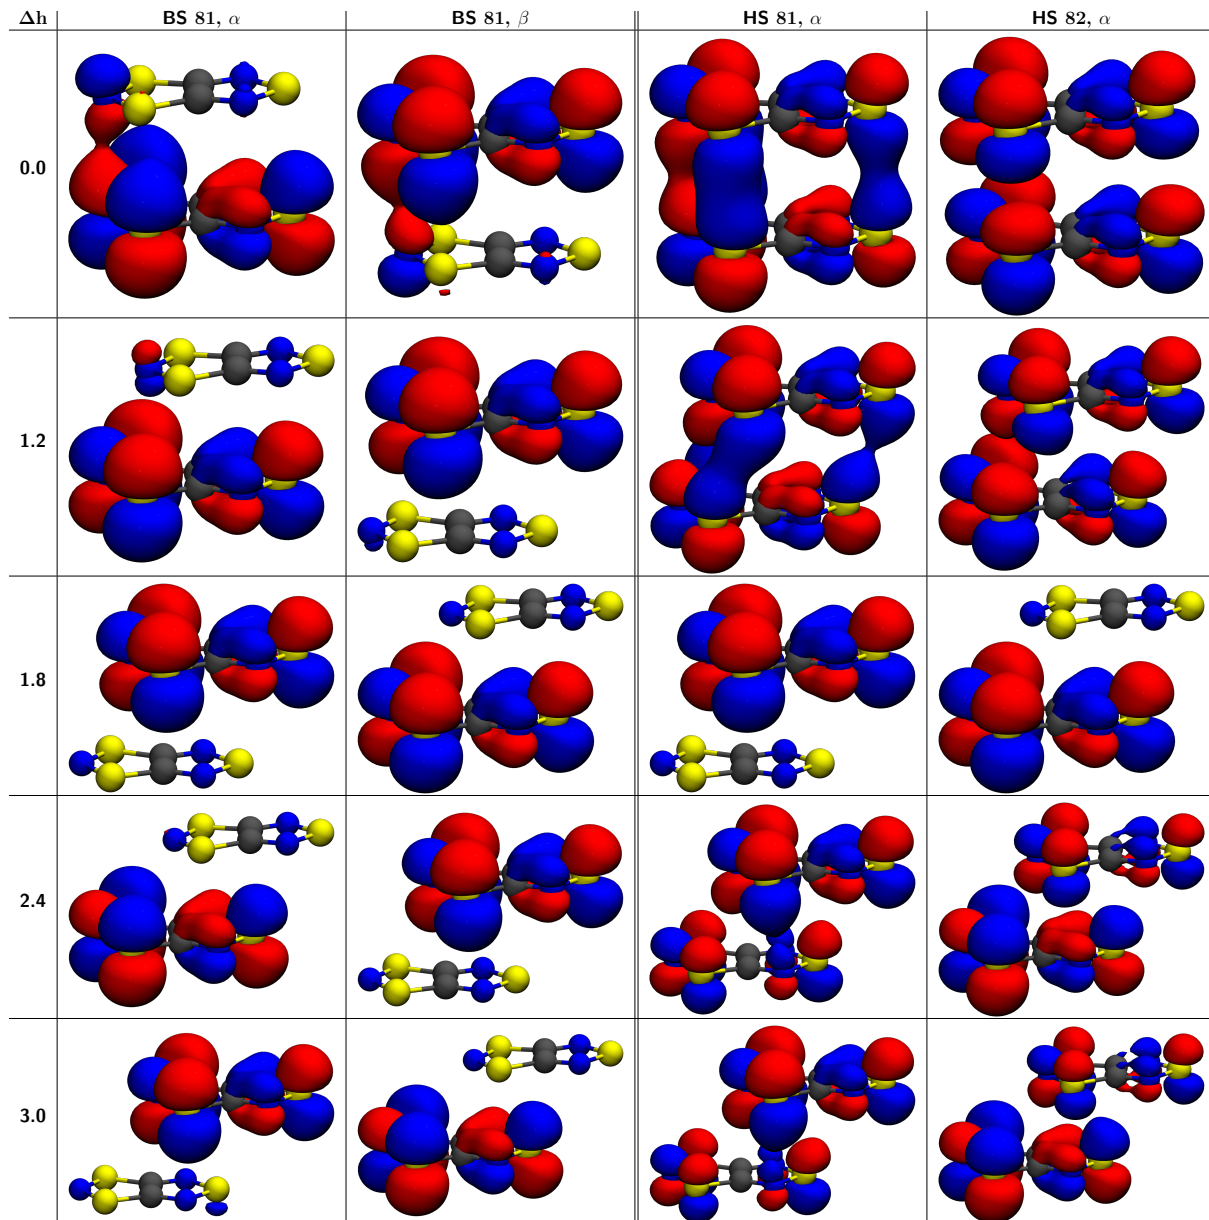

**Figure S14:** SOMO orbitals of dimer 1 for different  $\Delta h$  and  $\Delta v = 0.0 \text{ \AA}$  calculated with KS-DFT employing the PBE0 XC-functional and def2-SVP basis set for the HS and BS state. An isovalue of 0.025 a.u. was applied.

## S7 Interaction Energy

The intermolecular interaction energy was calculated via KS-DFT using the PBE0 XC functional and def2-TZVP basis-set without and with counterpoise correction, see Tab. S13 and Tab. S14. Dimer **1** has the strongest interaction in the HS state.

**Table S13:** Intermolecular interaction energy of the radical pairs, calculated with PBE0 KS-DFT as  $E_{\text{Dimer}} - E_{\text{Monomer 1}} - E_{\text{Monomer 2}}$  employing the def2-TZVP basis-set. The monomer structures are fixed from the dimer structure.

|          | HS / $E_h$ | BS / $E_h$ |
|----------|------------|------------|
| <b>1</b> | 0.0156     | 0.0063     |
| <b>2</b> | 0.0015     | 0.0009     |
| <b>3</b> | -0.0036    | -0.0036    |
| <b>4</b> | -0.0016    | -0.0057    |
| <b>5</b> | -0.0021    | -0.0036    |
| <b>6</b> | -0.0155    | -0.0155    |

**Table S14:** Intermolecular interaction energy of the radical pairs, calculated with PBE0 KS-DFT as  $E_{\text{Dimer}} - E_{\text{Monomer 1}} - E_{\text{Monomer 2}}$  with the def2-TZVP basis-set and counterpoise correction. The monomer structures are fixed from the dimer structure.

|          | HS / $E_h$ | BS / $E_h$ |
|----------|------------|------------|
| <b>1</b> | 0.0167     | 0.0074     |
| <b>2</b> | 0.0024     | 0.0018     |
| <b>3</b> | -0.0030    | -0.0030    |
| <b>4</b> | 0.0010     | -0.0031    |
| <b>5</b> | -0.0004    | -0.0019    |
| <b>6</b> | -0.0148    | -0.0147    |

The values in the heat maps shown in Fig. 6 in the main article possess the same values within the reported precision at 1.8 Å, but there are actually small differences as shown in Tab. S15.

**Table S15:** Geometric dependency of the magnetic exchange coupling constants with  $\Delta h = 1.8 \text{ \AA}$ , see also Fig. 6 in the main article.

| $\Delta v$        | $\Delta h$       | KS-DFT                 | Isolated               | FAT                    |
|-------------------|------------------|------------------------|------------------------|------------------------|
| 0.2 $\text{\AA}$  | 1.8 $\text{\AA}$ | 7.49 $\text{cm}^{-1}$  | 7.42 $\text{cm}^{-1}$  | 6.01 $\text{cm}^{-1}$  |
| 0.1 $\text{\AA}$  | 1.8 $\text{\AA}$ | 9.77 $\text{cm}^{-1}$  | 10.15 $\text{cm}^{-1}$ | 8.12 $\text{cm}^{-1}$  |
| 0.0 $\text{\AA}$  | 1.8 $\text{\AA}$ | 12.51 $\text{cm}^{-1}$ | 13.19 $\text{cm}^{-1}$ | 10.54 $\text{cm}^{-1}$ |
| -0.1 $\text{\AA}$ | 1.8 $\text{\AA}$ | 15.72 $\text{cm}^{-1}$ | 16.31 $\text{cm}^{-1}$ | 13.15 $\text{cm}^{-1}$ |
| -0.2 $\text{\AA}$ | 1.8 $\text{\AA}$ | 19.16 $\text{cm}^{-1}$ | 19.08 $\text{cm}^{-1}$ | 15.36 $\text{cm}^{-1}$ |

## S8 $\langle S^2 \rangle$ Values

The  $\langle S^2 \rangle$  values of the HS and BS state for the KS-DFT calculations of compound **6** are shown in Fig. S15.

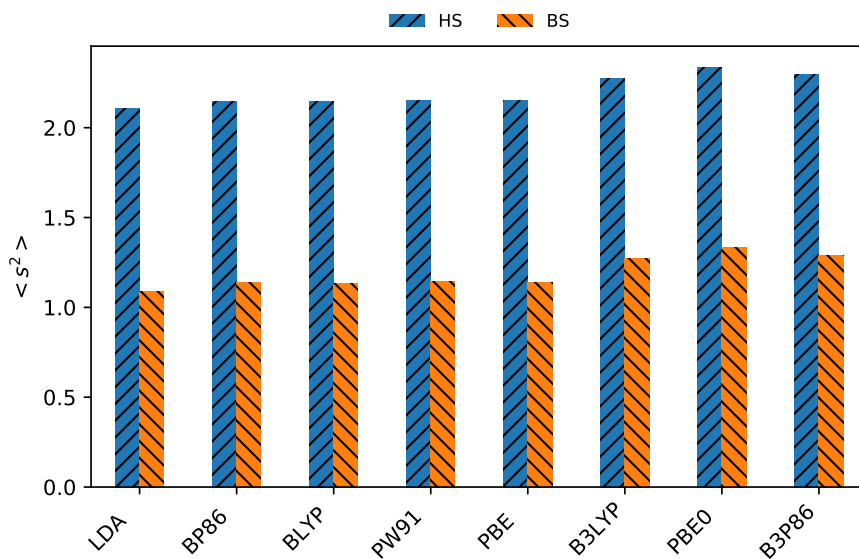

**Figure S15:** KS-DFT calculated  $\langle S \rangle$  values of compound **6** for the HS and BS state.

## References

- [1] Löwdin, P.-O. On the Non-Orthogonality Problem Connected with the Use of Atomic Wave Functions in the Theory of Molecules and Crystals. *The Journal of Chemical Physics* **1950**, *18*, 365–375.
- [2] Pipek, J. Controlled Orthogonalization of Localized Orbitals. *Int. J. Quantum Chem.* **1985**, *27*, 527–546.
- [3] Broer, R. On the Use of Corresponding Orbitals for the Construction of Mutually Orthogonal Orbital Sets. *Int. J. Quantum Chem.* **1993**, *45*, 587–590.
- [4] Mo, Y.; Peyerimhoff, S. D. Theoretical Analysis of Electronic Delocalization. *J. Chem. Phys.* **1998**, *109*, 1687–1697.
